# Supplementary material for: Redox behavior of small metal clusters with respect to hydrogen. The effect of the cluster charge from density functional results
Source: Royal Society of Chemistry journal article supplement (doi:10.1039/c004377j), 2010-01-01
Supplement: c004377j.pdf [file c004377j.pdf]

## Electronic Supplementary Information (ESI)

### Redox Behavior of Small Metal Clusters with Respect to Hydrogen. The Effect of the Cluster Charge from Density Functional Results

Galina P. Petrova,<sup>1</sup> Georgi N. Vayssilov,<sup>1\*</sup> and Notker Rösch<sup>2\*</sup>

<sup>1</sup> *Faculty of Chemistry, University of Sofia, 1126 Sofia, Bulgaria,  
e-mail: gnv@chem.uni-sofia.bg*

<sup>2</sup> *Department Chemie and Catalysis Research center, Technische Universität München, 85747  
Garching, Germany, e-mail: roesch@mytum.de*

**Table S1.** Calculated energy characteristics (in kJ/mol) and interatomic distances (in pm) of optimized structures, obtained by hydrogen adsorption on neutral and charged Ir<sub>4</sub> clusters in the gas phase.

|                                                  | $n^a$ | $\Delta E^b$ | Ns <sup>c</sup> | Ir <sub>b</sub> -Ir <sub>b</sub> <sup>d</sup> | Ir <sub>b</sub> -Ir <sub>t</sub> <sup>d</sup> | $\langle \text{Ir}-\text{Ir} \rangle^e$ | $\Delta R^f$ | Ir-H <sup>g</sup>         |                                                                                    |
|--------------------------------------------------|-------|--------------|-----------------|-----------------------------------------------|-----------------------------------------------|-----------------------------------------|--------------|---------------------------|------------------------------------------------------------------------------------|
|                                                  |       |              |                 |                                               |                                               |                                         |              | bridge                    | terminal                                                                           |
| Ir <sub>4</sub>                                  | 0     |              | 0               | 247, 248, 248                                 | 248, 248, 248                                 | 248                                     | 1            |                           |                                                                                    |
| [Ir <sub>4</sub> ] <sup>+</sup>                  | 0     |              | 1               | 241, 248, 250                                 | 240, 249, 250                                 | 246                                     | 9            |                           |                                                                                    |
| [Ir <sub>4</sub> ] <sup>2+</sup>                 | 0     |              | 2               | 237, 251, 251                                 | 237, 251, 252                                 | 247                                     | 14           |                           |                                                                                    |
| [Ir <sub>4</sub> ] <sup>3+</sup>                 | 0     |              | 3               | 241, 242, 257                                 | 241, 243, 258                                 | 247                                     | 17           |                           |                                                                                    |
| Ir <sub>4</sub> H <sub>3</sub>                   | 3     | -196         | 3               | 244, 245, 245                                 | 259, 260, 261                                 | 252                                     | 17           | 170/182, 170/185, 181/172 |                                                                                    |
| [Ir <sub>4</sub> H <sub>3</sub> ] <sup>+</sup>   | 3     | -179         | 2               | 246, 247, 247                                 | 257, 257, 259                                 | 252                                     | 14           | 169/182, 169/184, 178/172 |                                                                                    |
| [Ir <sub>4</sub> H <sub>3</sub> ] <sup>2+</sup>  | 3     | -201         | 1               | 248, 248, 249                                 | 251, 252, 260                                 | 251                                     | 12           | 168/182, 168/186, 169/181 |                                                                                    |
| [Ir <sub>4</sub> H <sub>3</sub> ] <sup>3+</sup>  | 3     | -270         | 0               | 249, 250, 251                                 | 250, 252, 252                                 | 251                                     | 3            | 167/184, 167/185, 167/186 |                                                                                    |
| Ir <sub>4</sub> H <sub>6</sub>                   | 6     | -487         | 0               | 245, 246, 246                                 | 266, 268, 268                                 | 256                                     | 24           | 167/197, 169/181, 169/182 | 159 <sub>t</sub>                                                                   |
| [Ir <sub>4</sub> H <sub>6</sub> ] <sup>+</sup>   | 6     | -408         | 1               | 243, 244, 246                                 | 259, 270, 271                                 | 256                                     | 28           | 168/189, 170/181, 187/171 | 158 <sub>t</sub>                                                                   |
| [Ir <sub>4</sub> H <sub>6</sub> ] <sup>2+</sup>  | 6     | -427         | 0               | 246, 248, 250                                 | 253, 261, 273                                 | 255                                     | 26           | 165/195, 166/193, 167/182 | 160 <sub>t</sub> , 170 <sub>t</sub> (93)                                           |
| [Ir <sub>4</sub> H <sub>6</sub> ] <sup>3+</sup>  | 6     | -475         | 1               | 242, 251, 252                                 | 257, 267, 280                                 | 258                                     | 38           | 165/196, 166/194, 169/178 | 159 <sub>t</sub> , 171 <sub>t</sub> (94)                                           |
| Ir <sub>4</sub> H <sub>9</sub>                   | 9     | -637         | 1               | 243, 251, 272                                 | 264, 270, 275                                 | 262                                     | 32           | 167/193, 169/184, 178/169 | 158 <sub>t</sub> , 162 <sub>b</sub>                                                |
| [Ir <sub>4</sub> H <sub>9</sub> ] <sup>+</sup>   | 9     | -555         | 0               | 240, 249, 273                                 | 264, 271, 278                                 | 262                                     | 38           | 166/202, 170/181, 179/169 | 158 <sub>t</sub> , 161 <sub>b</sub>                                                |
| [Ir <sub>4</sub> H <sub>9</sub> ] <sup>2+</sup>  | 9     | -544         | 1               | 245, 251, 271                                 | 266, 270, 295                                 | 261                                     | 50           | 161/226, 167/176, 173/169 | 157 <sub>t</sub> , 161 <sub>b</sub> , 169 <sub>t</sub> (94)                        |
| [Ir <sub>4</sub> H <sub>9</sub> ] <sup>3+</sup>  | 9     | -727         | 0               | 251, 254, 262                                 | 248, 272, 308                                 | 257 <sup>h</sup>                        | 60           | 167/182                   | 155 <sub>t</sub> , 158 <sub>b</sub> , 169 <sub>t</sub> (96), 173 <sub>b</sub> (91) |
| Ir <sub>4</sub> H <sub>12</sub>                  | 12    | -888         | 0               | 264, 266, 271                                 | 266, 268, 268                                 | 267                                     | 7            | 165/188, 169/182, 172/173 | 159 <sub>t</sub> , 160 <sub>b</sub>                                                |
| [Ir <sub>4</sub> H <sub>12</sub> ] <sup>+</sup>  | 12    | -761         | 1               | 270, 272, 276                                 | 262, 271, 271                                 | 270                                     | 14           | 164/189, 166/189, 173/173 | 159 <sub>t</sub> , 159 <sub>b</sub>                                                |
| [Ir <sub>4</sub> H <sub>12</sub> ] <sup>2+</sup> | 12    | -809         | 0               | 264, 277, 279                                 | 251, 264, 271                                 | 268                                     | 28           | 159/206, 162/192, 168/299 | 163 <sub>t</sub> , 158 <sub>b</sub> , 170 <sub>b</sub> (90)                        |
| [Ir <sub>4</sub> H <sub>12</sub> ] <sup>3+</sup> | 12    | -874         | 1               | 269, 269, 280                                 | 249, 265, 291                                 | 266 <sup>h</sup>                        | 42           | 162/204, 163/193          | 159 <sub>t</sub> , 159 <sub>b</sub> , 169 <sub>t</sub> (94), 171 <sub>b</sub> (92) |

<sup>a</sup> Number of hydrogen ligands on the metal cluster. <sup>b</sup> Relative stability of the hydrogenated cluster; see text, Eq. (1).

<sup>c</sup> Number of unpaired electrons in the complex. <sup>d</sup> Ir<sub>b</sub> – metal atoms at the base of the trigonal pyramid; Ir<sub>t</sub> – iridium center at the apex of the cluster, see Figure S1 below.

<sup>e</sup> Average nearest-neighbor distance of the metal moiety. <sup>f</sup> Difference between the largest and the smallest nearest-neighbor distances of the optimized structures.

<sup>g</sup> Ir-H distances for H adsorption at a distorted bridge site are given as pairs of values, Ir<sub>b</sub>-H/Ir<sub>t</sub>-H. For terminal hydrogen atoms only average values are provided; subscripts t and b denote distances of H atoms coordinated on-top at Ir<sub>t</sub> and Ir<sub>b</sub> atoms, respectively. In the structures [Ir<sub>4</sub>H<sub>n</sub>]<sup>q+</sup> with high hydrogen loading, for n = 6, 9 or 12, pairs of closely situated hydrogen atoms, i.e. activated H<sub>2</sub> molecules, are indicated their average Ir-H distance and their H-H distances (provided in parentheses, italics). These latter Ir-H distances are larger than average Ir-H distances for terminal bonding and are given as last entries, separately for each pair.

<sup>h</sup> Ir-Ir distances exceeding 290 pm (Ir<sub>b</sub>-Ir<sub>t</sub> = 308 pm in [Ir<sub>4</sub>H<sub>9</sub>]<sup>3+</sup>; Ir<sub>b</sub>-Ir<sub>t</sub> = 291 pm in [Ir<sub>4</sub>H<sub>12</sub>]<sup>3+</sup>) are not included in the calculation of the average  $\langle \text{Ir}-\text{Ir} \rangle$ .

**Table S2.** Various characteristics calculated for the bare metal clusters  $[\text{Ir}_4]^{q+}$  and their hydrogenated congeners  $[\text{Ir}_4\text{H}_n]^{q+}$  ( $q = 0-3$ ): HOMO-LUMO gap, in eV; ionization potential, IP in eV; Mulliken charge of the  $\text{Ir}_4$  moiety,  $\text{MC}(\text{Ir}_4)$  in e; average energy,  $\varepsilon$ , and the corresponding range,  $\delta$ , in eV, of Ir 2p, 4f, and 5s levels, and the average shift of all levels,  $\langle\Delta\varepsilon\rangle$  in eV.

|                                   | gap  | IP   | MC( $\text{Ir}_4$ ) | Ir 2p         |          | Ir 4f         |          | Ir 5s         |          | $\langle\Delta\varepsilon\rangle$ |
|-----------------------------------|------|------|---------------------|---------------|----------|---------------|----------|---------------|----------|-----------------------------------|
|                                   |      |      |                     | $\varepsilon$ | $\delta$ | $\varepsilon$ | $\delta$ | $\varepsilon$ | $\delta$ |                                   |
| $\text{Ir}_4$                     | 0.79 |      | 0                   | -11572.9      | 0.00     | -59.74        | 0.19     | -95.09        | 0.08     |                                   |
| $[\text{Ir}_4]^+$                 | 0.26 | 6.8  | 1                   | -11578.5      | 0.10     | -65.37        | 0.29     | -100.71       | 0.25     |                                   |
| $[\text{Ir}_4]^{2+}$              | 0.51 | 12.2 | 2                   | -11584.5      | 0.04     | -71.35        | 0.29     | -106.68       | 0.33     |                                   |
| $[\text{Ir}_4]^{3+}$              | 0.59 | 18.2 | 3                   | -11591.0      | 0.07     | -77.79        | 0.30     | -113.10       | 0.47     |                                   |
| $\text{Ir}_4\text{H}_3$           | 0.55 |      | 0.08                | -11574.0      | 0.37     | -60.82        | 0.60     | -96.16        | 0.69     | 1.07                              |
| $[\text{Ir}_4\text{H}_3]^+$       | 0.38 | 7.0  | 0.93                | -11578.7      | 0.21     | -65.54        | 0.42     | -100.89       | 0.52     | 0.17                              |
| $[\text{Ir}_4\text{H}_3]^{2+}$    | 0.30 | 12.0 | 1.71                | -11584.4      | 0.45     | -71.20        | 0.68     | -106.54       | 0.65     | -0.14                             |
| $[\text{Ir}_4\text{H}_3]^{3+}$    | 1.03 | 17.5 | 2.47                | -11590.4      | 0.58     | -77.23        | 0.81     | -112.55       | 0.59     | -0.56                             |
| $\text{Ir}_4\text{H}_6$           | 1.12 |      | 0.25                | -11573.9      | 0.17     | -60.72        | 0.44     | -96.06        | 0.24     | 0.97                              |
| $[\text{Ir}_4\text{H}_6]^+$       | 0.40 | 7.6  | 0.75                | -11579.2      | 0.37     | -66.04        | 0.60     | -101.38       | 0.52     | 0.68                              |
| $[\text{Ir}_4\text{H}_6]^{2+}$    | 0.67 | 12.0 | 1.38                | -11584.2      | 1.28     | -71.02        | 1.45     | -106.35       | 1.23     | -0.32                             |
| $[\text{Ir}_4\text{H}_6]^{3+}$    | 0.49 | 17.7 | 1.96                | -11590.0      | 0.37     | -76.82        | 0.57     | -112.13       | 0.38     | -0.97                             |
| $\text{Ir}_4\text{H}_9$           | 0.83 |      | 0.27                | -11574.4      | 0.81     | -61.26        | 1.01     | -96.59        | 1.01     | 1.52                              |
| $[\text{Ir}_4\text{H}_9]^+$       | 0.76 | 7.6  | 0.64                | -11579.4      | 1.26     | -66.25        | 1.56     | -101.58       | 1.26     | 0.89                              |
| $[\text{Ir}_4\text{H}_9]^{2+}$    | 0.49 | 12.3 | 1.16                | -11584.3      | 0.96     | -71.12        | 1.22     | -106.44       | 1.03     | -0.23                             |
| $[\text{Ir}_4\text{H}_9]^{3+}$    | 0.97 | 16.3 | 1.50                | -11589.4      | 0.84     | -76.18        | 1.10     | -111.50       | 0.83     | -1.61                             |
| $\text{Ir}_4\text{H}_{12}$        | 2.21 |      | 0.44                | -11574.6      | 0.23     | -61.41        | 0.39     | -96.74        | 0.20     | 1.67                              |
| $[\text{Ir}_4\text{H}_{12}]^+$    | 0.73 | 8.1  | 0.61                | -11579.4      | 0.72     | -66.25        | 0.90     | -101.58       | 0.76     | 0.88                              |
| $[\text{Ir}_4\text{H}_{12}]^{2+}$ | 1.61 | 11.7 | 0.82                | -11584.0      | 0.61     | -70.84        | 0.77     | -106.17       | 0.59     | -0.50                             |
| $[\text{Ir}_4\text{H}_{12}]^{3+}$ | 0.67 | 17.5 | 0.90                | -11589.3      | 0.35     | -76.06        | 0.54     | -111.38       | 0.45     | -1.72                             |

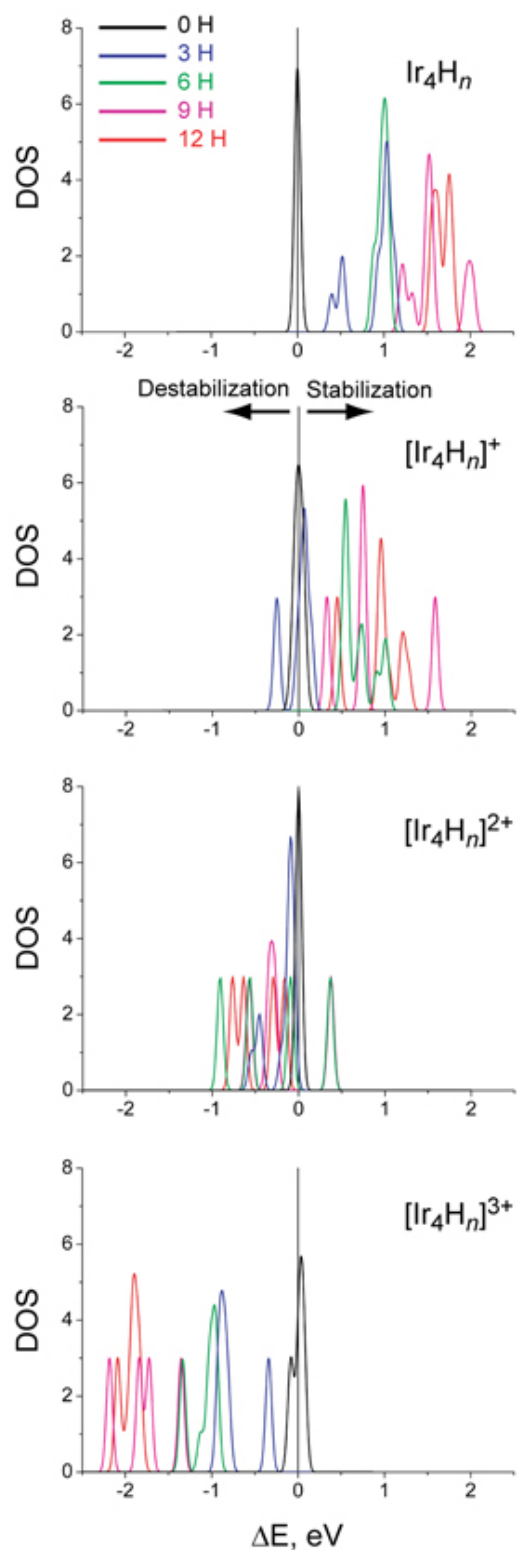

**Figure S1.** DOS plots for Ir 2p core levels of Ir centers of the bare clusters  $[\text{Ir}_4]^{q+}$  and the hydrogenated clusters  $[\text{Ir}_4\text{H}_n]^{q+}$  ( $q = 0-3$ ), relative to the energy of the Ir 2p level of the  $\text{Ir}_4$  cluster with corresponding charge  $q$ . The 2p levels of  $[\text{Ir}_4]^{3+}$  form two groups of different energies; therefore an average value is used to estimate of the energy shifts of the hydrogenated species. The energies of the Ir 2p levels of the bare clusters are -11572.9 eV in  $\text{Ir}_4$ , -11578.5 eV in  $[\text{Ir}_4]^+$ , -11584.5 eV in  $[\text{Ir}_4]^{2+}$ , and -11591.0 eV in  $[\text{Ir}_4]^{3+}$ .

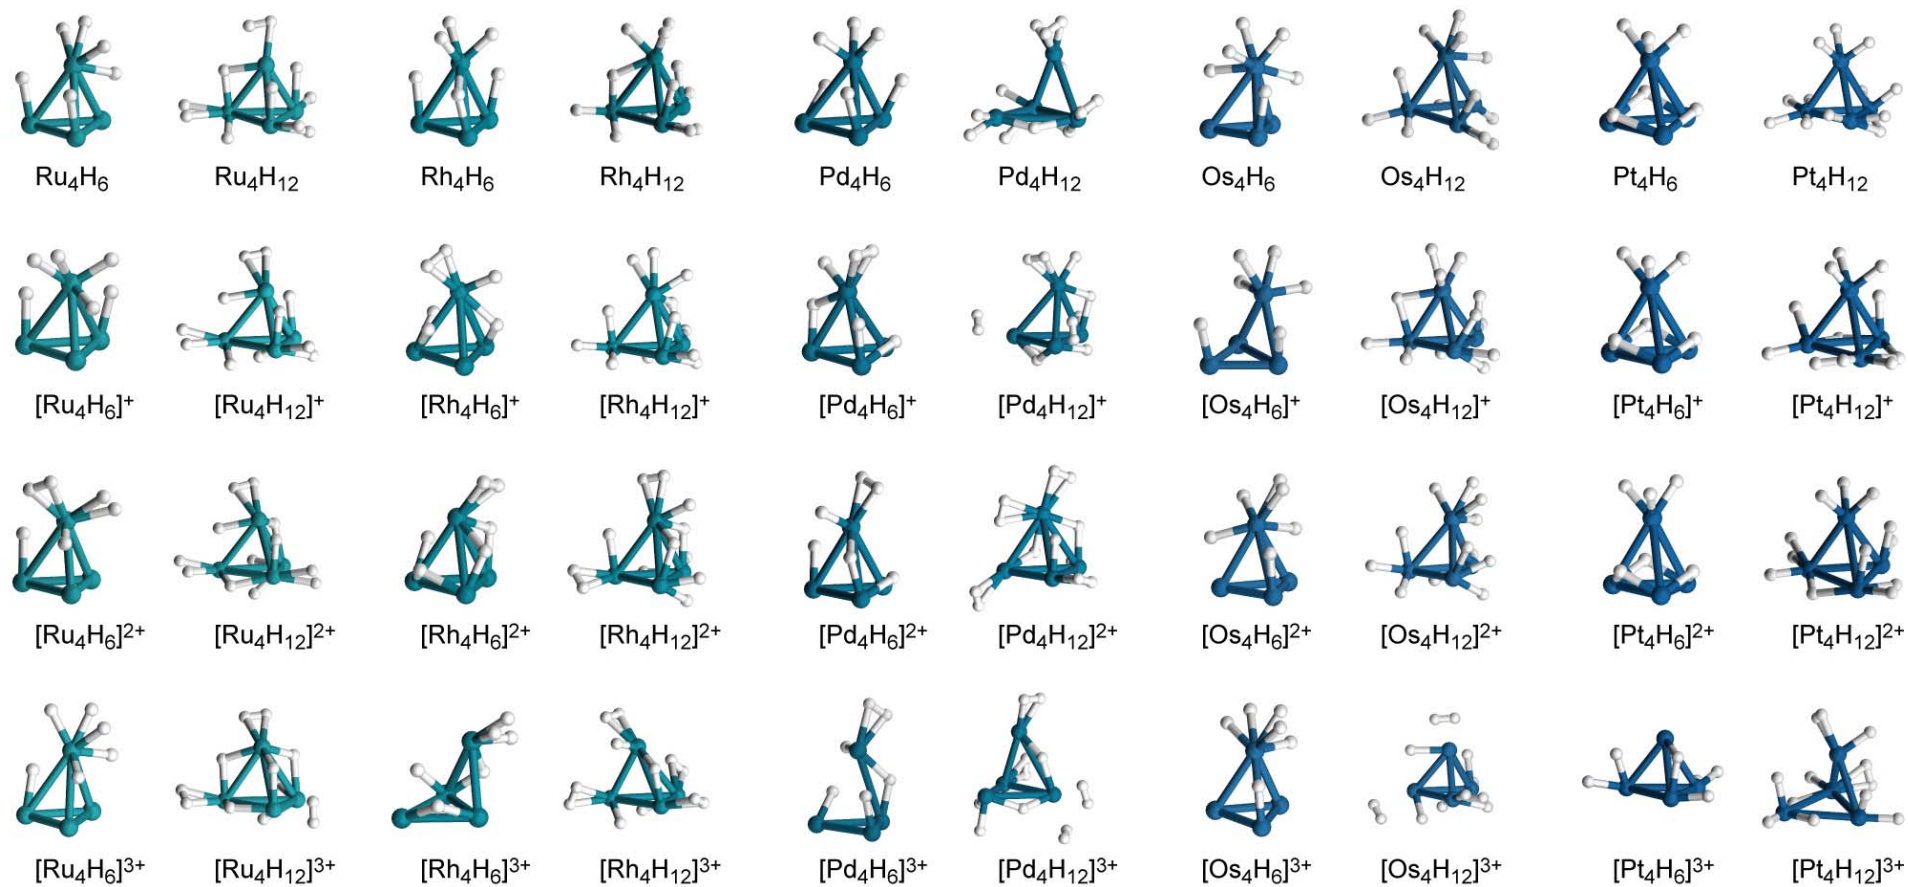

**Figure S2.** Optimized structures of  $[\text{M}_4\text{H}_n]^{q+}$  species for  $q = 0, 1, 2, 3$  and  $n = 6, 12$ .

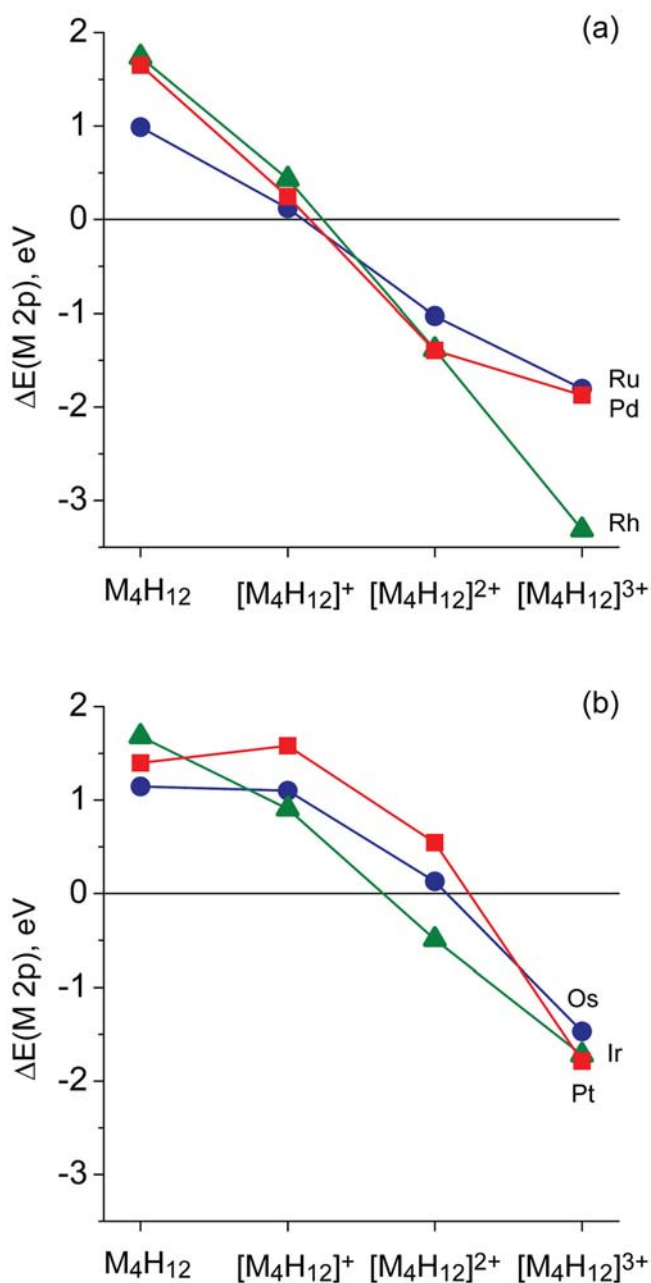

**Figure S3.** Variations of the average shifts of the M 2p levels in  $[M_4H_{12}]^{q+}$  clusters with the total charge of the complexes of the (a) 4d and (b) 5d transition metals.
